# Supplementary material
Source: PubMed Central journal article supplement (PMC3361401)
Supplement: 1121113109_pnas.201121113SI.pdf [file 1121113109_pnas.201121113SI.pdf]

# Supporting Information

Yuan et al. 10.1073/pnas.1121113109

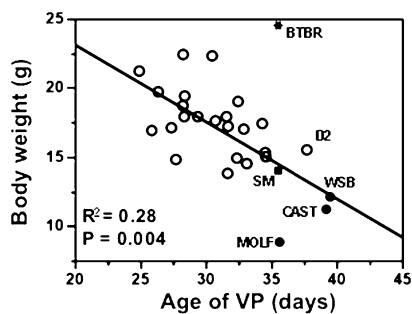

Fig. S1. Correlation between the age of vaginal patency (VP) and body weight at 38 d among inbred strains.

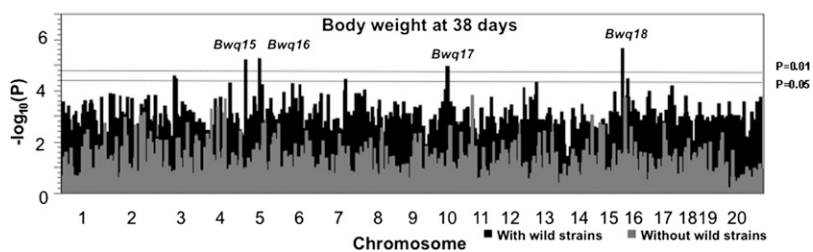

Fig. S2. Haplotype association mapping for body weight at 38 d. Dashed lines represent  $P = 0.01$  and  $P = 0.05$  in the permutation test ( $n = 1,000$ ). Black bars are scans including wild-derived strains; gray bars are scans without wild-derived strains.

**Table S1. Lifespan parameters of inbred strains**

| Strain         | Female (d)   |          |      |     |        |           |              | Male (d)     |          |      |     |        |           |              |
|----------------|--------------|----------|------|-----|--------|-----------|--------------|--------------|----------|------|-----|--------|-----------|--------------|
|                | Normal death | Censored | Mean | SEM | Median | 95% CI    | 25~75% death | Normal death | Censored | Mean | SEM | Median | 95% CI    | 25~75% death |
| 129S1/SvlmJ    | 32           | 0        | 787  | 28  | 781    | 673~869   | 666~923      | 32           | 0        | 878  | 23  | 879    | 809~959   | 798~991      |
| A/J            | 32           | 0        | 631  | 23  | 654    | 610~694   | 531~745      | 30           | 2        | 618  | 23  | 623    | 555~681   | 537~708      |
| AKR/J          | 31           | 1        | 276  | 17  | 251    | 224~266   | 214~321      | 32           | 0        | 293  | 12  | 288    | 245~325   | 238~327      |
| BALB/cByJ      | 32           | 0        | 734  | 27  | 771    | 715~819   | 669~839      | 32           | 0        | 664  | 36  | 711    | 527~758   | 508~804      |
| BTBR T+ tf/J   | 32           | 0        | 580  | 24  | 604    | 547~644   | 533~662      | 32           | 0        | 592  | 28  | 568    | 456~694   | 441~722      |
| BUB/BnJ        | 24           | 8        | 611  | 45  | 625    | 457~722   | 456~768      | 25           | 7        | 586  | 52  | 493    | 354~855   | 354~873      |
| C3H/HeJ        | 29           | 3        | 727  | 23  | 777    | 659~813   | 622~820      | 32           | 0        | 719  | 25  | 721    | 630~820   | 621~834      |
| C57BL/10J      | 32           | 0        | 829  | 41  | 888    | 692~908   | 653~993      | 27           | 5        | 720  | 39  | 792    | 733~849   | 677~852      |
| C57BL/6J       | 29           | 3        | 858  | 33  | 866    | 782~952   | 776~999      | 32           | 0        | 894  | 20  | 901    | 859~929   | 832~958      |
| C57BLKS/J      | 32           | 0        | 739  | 38  | 853    | 672~873   | 584~888      | 32           | 0        | 815  | 31  | 823    | 784~889   | 770~912      |
| C57BR/cdJ      | 32           | 0        | 806  | 36  | 876    | 792~905   | 775~926      | 32           | 0        | 831  | 24  | 849    | 754~907   | 733~938      |
| C57L/J         | 32           | 0        | 713  | 14  | 725    | 706~737   | 700~744      | 32           | 0        | 703  | 17  | 732    | 660~755   | 658~766      |
| CAST/EiJ       | 17           | 8        | 578  | 53  | 671    | 475~748   | 475~763      |              |          |      |     |        |           |              |
| CBA/J          | 30           | 2        | 636  | 32  | 652    | 532~777   | 475~786      | 32           | 0        | 647  | 30  | 665    | 539~750   | 520~793      |
| DBA/2J         | 32           | 0        | 580  | 39  | 650    | 413~707   | 355~785      | 32           | 0        | 595  | 40  | 698    | 492~745   | 391~758      |
| FVB/NJ         | 29           | 3        | 705  | 50  | 760    | 602~869   | 564~944      | 25           | 7        | 620  | 37  | 591    | 562~693   | 553~708      |
| KK/HIJ         | 32           | 0        | 575  | 24  | 593    | 551~614   | 524~646      | 32           | 0        | 635  | 24  | 633    | 548~693   | 539~707      |
| LP/J           | 32           | 0        | 786  | 38  | 808    | 721~875   | 708~956      | 32           | 0        | 806  | 20  | 815    | 723~834   | 721~859      |
| MOLF           | 32           | 0        | 681  | 30  | 695    | 590~736   | 579~792      | 32           | 0        | 587  | 23  | 639    | 557~651   | 538~668      |
| MRL/MpJ        | 31           | 1        | 534  | 22  | 554    | 452~603   | 415~640      |              |          |      |     |        |           |              |
| NOD.B10Sn-H2/J | 32           | 0        | 617  | 35  | 661    | 556~740   | 529~755      | 31           | 1        | 670  | 40  | 696    | 550~773   | 501~878      |
| NON/ShiLtJ     | 31           | 1        | 724  | 25  | 750    | 631~819   | 617~840      | 32           | 0        | 821  | 25  | 845    | 799~904   | 786~915      |
| NZO/HILtJ      | 32           | 0        | 548  | 33  | 569    | 405~682   | 393~691      | 31           | 1        | 467  | 35  | 423    | 286~568   | 283~637      |
| NZW/LacJ       | 32           | 0        | 730  | 26  | 730    | 617~813   | 604~835      | 32           | 0        | 802  | 42  | 780    | 642~977   | 600~1,003    |
| P/J            | 32           | 0        | 676  | 32  | 686    | 560~792   | 553~813      |              |          |      |     |        |           |              |
| PL/J           | 32           | 0        | 462  | 24  | 408    | 386~512   | 380~520      | 32           | 0        | 471  | 23  | 463    | 365~538   | 365~557      |
| PWD/PhJ        | 32           | 0        | 786  | 36  | 854    | 697~921   | 673~941      | 27           | 5        | 717  | 48  | 813    | 578~901   | 575~905      |
| RIIS/J         | 32           | 0        | 786  | 19  | 792    | 735~842   | 715~860      | 32           | 0        | 847  | 19  | 860    | 799~926   | 772~940      |
| SJL/J          | 30           | 2        | 510  | 30  | 488    | 393~560   | 373~609      | 16           | 16       | 496  | 32  | 514    | 392~568   | 470~574      |
| SM/J           | 32           | 0        | 732  | 26  | 753    | 712~786   | 691~789      | 31           | 1        | 731  | 31  | 783    | 741~818   | 711~833      |
| SWR/J          | 31           | 1        | 644  | 37  | 654    | 548~743   | 516~812      | 32           | 0        | 655  | 46  | 714    | 411~812   | 377~852      |
| WSB/EiJ        | 32           | 0        | 853  | 64  | 954    | 713~1,131 | 650~1,169    | 32           | 0        | 809  | 64  | 953    | 662~1,050 | 430~1,101    |
| Total          | 984          | 33       | 672  | 7   | 693    | 677~708   | 533~833      | 883          | 45       | 684  | 8   | 720    | 706~736   | 532~849      |

Data updated since 2009 (1).

1. Yuan R, et al. (2009) Aging in inbred strains of mice: Study design and interim report on median lifespans and circulating IGF1 levels. *Aging Cell* 8:277-287.

**Table S2. Cross-strains comparison of ages of vaginal patency**

| Strain                          | Abbreviation |                             | Mean | SEM | No. |
|---------------------------------|--------------|-----------------------------|------|-----|-----|
| PWD/PhJ                         | PWD*         | A                           | 42.9 | 0.7 | 43  |
| WSB/EiJ                         | WSB*         | B                           | 39.5 | 0.8 | 42  |
| CAST/EiJ                        | CAST*        | A B C D                     | 39.2 | 2.0 | 10  |
| DBA/2J                          | D2           | B C                         | 37.7 | 0.7 | 51  |
| MOLF/EiJ                        | MOLF*        | C D E F                     | 35.6 | 0.9 | 29  |
| C57BL/6J                        | B6           | C D E F                     | 35.6 | 0.2 | 29  |
| BTBR <i>T<sub>+</sub> tff/J</i> | BTBR         | C D E                       | 35.5 | 0.3 | 47  |
| SM/J                            | SM           | C D E F H                   | 35.5 | 1.2 | 20  |
| LP/J                            | LP           | C D E F G H                 | 34.6 | 0.8 | 26  |
| SJL/J                           | SJL          | D E F H                     | 34.5 | 1.0 | 51  |
| PL/J                            | PL           | E F G H I J                 | 33.1 | 0.3 | 16  |
| C57BR/cdJ                       | BR           | E F G H I                   | 32.9 | 0.7 | 28  |
| BALB/cByJ                       | cBy          | F G H I                     | 32.5 | 0.4 | 50  |
| RHIS/J                          | R3           | E F G H I J K L             | 32.4 | 0.3 | 19  |
| NZW/LacJ                        | NZW          | E F G H I J K L M           | 31.7 | 0.7 | 20  |
| C57BL/10J                       | B10          | G I J L                     | 31.7 | 0.6 | 60  |
| C57BLKS/J                       | BKS          | G H I J K L                 | 31.6 | 0.4 | 38  |
| P/J                             | P            | C D E F G H I J K L M N O P | 31.0 | 0.4 | 4   |
| A/J                             | A            | I J K L M                   | 30.7 | 0.6 | 50  |
| KK/Hij                          | KK           | I J K L M N                 | 30.5 | 0.5 | 37  |
| C3H/HeJ                         | C3H          | J K L M N O                 | 29.4 | 0.5 | 53  |
| MRL/MpJ                         | MRL          | K M N O P                   | 28.5 | 0.3 | 35  |
| CBA/J                           | CBA          | M N O P                     | 28.4 | 0.5 | 55  |
| 129S1/SvImJ                     | 129S1        | M N O P                     | 28.4 | 0.4 | 47  |
| AKR/J                           | AKR          | K L M N O P                 | 28.3 | 0.5 | 25  |
| NOD.B10Sn-H2/J                  | NOD.B10      | K M N O P                   | 28.3 | 0.7 | 34  |
| SWR/J                           | SWR          | N O P                       | 27.7 | 0.4 | 74  |
| C57L/J                          | L            | K L M N O P                 | 27.4 | 0.4 | 13  |
| BUB/BnJ                         | BUB          | P                           | 26.4 | 0.4 | 60  |
| FVB/NJ                          | FVB          | P                           | 25.9 | 0.4 | 74  |
| NON/ShiLtJ                      | NON          | O P                         | 24.9 | 0.6 | 11  |

\*Wild-derived inbred strains. Strains connected by different letters are significantly different ( $P < 0.05$ ).  $P$  values were adjusted by the Tukey HSC method.

**Table S3. Lifespan parameters of B6 and B6.C3H-Igf1 mice**

| Strain      | Female     |                 |     | Male       |                 |     |
|-------------|------------|-----------------|-----|------------|-----------------|-----|
|             | Mean (SEM) | Median (95% CI) | No. | Mean (SEM) | Median (95% CI) | No. |
| B6          | 810 (32)   | 839 (756~909)   | 32  | 866 (28)   | 872 (796~951)   | 32  |
| B6.C3H-Igf1 | 656 (24)   | 683 (606~745)   | 70  | 831 (24)   | 888 (825~924)   | 60  |

CI, confidence interval.

**Table S4. Haplotype groups of *Vpq1***

| HAM ID          | SNP Score | SNP name    | Position Chr (bp) | CAST | MOLF | PWD | WSB | SM | BTBR | B10 | B6 | BLK | D2 | KK    | PL | R3 | A | AK | cBy | C3 | BR | CBA | FVB | L | LP | MRL | NOD | NON | NZW | SJL | SWR | 129S1 | BUB |   |
|-----------------|-----------|-------------|-------------------|------|------|-----|-----|----|------|-----|----|-----|----|-------|----|----|---|----|-----|----|----|-----|-----|---|----|-----|-----|-----|-----|-----|-----|-------|-----|---|
| <i>Vpq1</i>     | 5.54      | rs13477738  | 4 62690603        | 2    | 2    | 2   | 2   | 2  | 3    | 3   | 3  | 3   | 3  | 3     | 3  | 3  | 0 | 0  | 0   | 0  | 0  | 0   | 0   | 0 | 0  | 0   | 0   | 0   | 0   | 0   | 0   | 0     | 0   |   |
|                 | 5.54      | NES09402911 | 4 62730288        | 2    | 2    | 2   | 2   | 2  | 3    | 3   | 3  | 3   | 3  | 3     | 3  | 3  | 0 | 0  | 0   | 0  | 0  | 0   | 0   | 0 | 0  | 0   | 0   | 0   | 0   | 0   | 0   | 0     | 0   |   |
|                 | 5.54      | NES09401593 | 4 62761940        | 2    | 2    | 2   | 2   | 2  | 3    | 3   | 3  | 3   | 3  | 3     | 3  | 3  | 0 | 0  | 0   | 0  | 0  | 0   | 0   | 0 | 0  | 0   | 0   | 0   | 0   | 0   | 0   | 0     | 0   | 0 |
| Haplotype group |           |             |                   | H-I  |      |     |     |    | H-II |     |    |     |    | H-III |    |    |   |    |     |    |    |     |     |   |    |     |     |     |     |     |     |       |     |   |

Score of each quantitative trait locus (QTL) is  $-\log_{10}P$ . SNP positions are from National Center for Biotechnology Information (NCBI) build 37. Haplotypes of each SNP were determined using the Hidden Markov Model (HMM) method. The combination of haplotypes of SNPs for each haplotype association mapping (HAM) ID defines the haplotype groups, which are used in Fig. 3. Chr, chromosome.

**Table S5. Haplotype groups of *Vpq2***

| HAM ID          | SNP Score | SNP name    | Position Chr (bp) | CAST | MOLF | PWD | WSB | SM | 129S1 | LP | NZW | SJL | C3 | CBA   | BTBR | B10 | B6 | BLK | D2   | KK | P | PL | R3 | BR | L | A | AK | cBy | BUB | FVB | MRL | NOD | NON | SWR |
|-----------------|-----------|-------------|-------------------|------|------|-----|-----|----|-------|----|-----|-----|----|-------|------|-----|----|-----|------|----|---|----|----|----|---|---|----|-----|-----|-----|-----|-----|-----|-----|
| <i>Vpq2</i>     | 5.27      | 16-37537086 | 16 37682809       | 1    | 1    | 1   | 1   | 1  | 2     | 2  | 2   | 2   | 2  | 2     | 2    | 2   | 2  | 2   | 2    | 2  | 2 | 2  | 2  | 3  | 3 | 0 | 0  | 0   | 0   | 0   | 0   | 0   | 0   | 0   |
|                 | 5.27      | NES12101893 | 16 37705326       | 1    | 1    | 1   | 1   | 1  | 2     | 2  | 2   | 2   | 2  | 2     | 2    | 2   | 2  | 2   | 2    | 2  | 2 | 2  | 2  | 3  | 3 | 0 | 0  | 0   | 0   | 0   | 0   | 0   | 0   | 0   |
| Haplotype group |           |             |                   | H-I  |      |     |     |    | H-II  |    |     |     |    | H-III |      |     |    |     | H-IV |    |   |    |    |    |   |   |    |     |     |     |     |     |     |     |

Score of each QTL is  $-\log_{10}P$ . SNP positions are from NCBI build 37. Haplotypes of each SNP were determined using the HMM method. The combination of haplotypes of SNPs for each HAM ID defines the haplotype groups, which are used in Fig. 3.

**Table S6. Haplotype groups of *Vpq3***

| HAM ID          | SNP Score | SNP name    | Position Chr (bp) | CAST | MOLF | PWD | WSB | SM | A    | BR | L | SJL | D2 | PL    | R3 | B10 | B6 | BLK | 129S1 | LP | NZW | BTBR | KK | P   | AK | cBy | BUB | C3 | CBA | FVB | MRL | NOD | NON | SWR |
|-----------------|-----------|-------------|-------------------|------|------|-----|-----|----|------|----|---|-----|----|-------|----|-----|----|-----|-------|----|-----|------|----|-----|----|-----|-----|----|-----|-----|-----|-----|-----|-----|
| <i>Vpq3</i>     | 5.4       | NES12227206 | 16 74844038       | 3    | 3    | 3   | 3   | 2  | 2    | 2  | 2 | 2   | 2  | 2     | 2  | 0   | 0  | 0   | 1     | 1  | 1   | 1    | 1  | 1   | 4  | 4   | 4   | 4  | 4   | 4   | 4   | 4   | 4   | 4   |
| Haplotype group |           |             |                   | H-I  |      |     |     |    | H-II |    |   |     |    | H-III |    |     |    |     | H-IV  |    |     |      |    | H-V |    |     |     |    |     |     |     |     |     |     |

Score of each QTL is  $-\log_{10}P$ . SNP positions are from NCBI build 37. Haplotypes of each SNP were determined using the HMM method. The combination of haplotypes of SNPs for each HAM ID defines the haplotype groups, which are used in Fig. 3.

**Table S7. Candidate genes in *Vpq1*, *Vpq2*, and *Vpq3***

|             | Candidate genes     | Location*                    |
|-------------|---------------------|------------------------------|
| <i>Vpq1</i> | <i>Zfp618</i>       | Chr4: 62,626,607–62,800,742  |
|             | <i>Whrn</i>         | Chr4: 63,075,944–63,157,025  |
| <i>Vpq2</i> | <i>Sema5b</i>       | Chr16: 35,541,231–35,664,818 |
|             | <i>Hcls1</i>        | Chr16: 36,935,101–36,963,300 |
|             | <i>Fbxo40</i>       | Chr16: 36,963,546–36,990,553 |
|             | <i>Stxbp5l</i>      | Chr16: 37,115,028–37,385,048 |
|             | <i>Polq</i>         | Chr16: 37,011,872–37,095,483 |
|             | <i>Loc100043217</i> | Chr16: 35,894,376–35,921,294 |
| <i>Vpq3</i> | <i>Robo1</i>        | Chr16: 72,663,394–73,046,340 |
|             | <i>Nrip1</i>        | Chr16: 76,287,645–76,374,072 |

\*NCBI build 37. We extended 2 Mb at each side of *Vpq1*, 2, and 3 to search for candidate genes.
